# Supplementary material
Source: HighWire-hosted journal article supplement (https://err.ersjournals.com/content/32/168/230019)
Supplement: inline-supplementary-material-1 [file inline-supplementary-material-1.pdf]

## Supplementary Information

### Extreme weather and asthma: A systematic review and meta-analysis

Firdian Makrufardi<sup>1,2</sup> (MD), Amja Manullang<sup>1</sup> (MSc), Desy Rusmawatingtyas<sup>2</sup> (MD, MSc), Kian Fan Chung<sup>3</sup> (MD, DSc), Sheng-Chieh Lin<sup>4,5\*</sup> (MD, PhD), Hsiao-Chi Chuang<sup>6,7,8,9\*</sup> (PhD)

<sup>1</sup>International Ph.D. Program in Medicine, College of Medicine, Taipei Medical University, Taipei, Taiwan

<sup>2</sup>Department of Child Health, Faculty of Medicine, Public Health, and Nursing, Universitas Gadjah Mada – Dr. Sardjito Hospital, Yogyakarta, Indonesia

<sup>3</sup>National Heart and Lung Institute, Imperial College London, London, UK

<sup>4</sup>Department of Pediatrics, School of Medicine, College of Medicine, Taipei Medical University, Taipei, Taiwan

<sup>5</sup>Division of Allergy, Immunology, and Rheumatology, Department of Pediatrics, Shuang Ho Hospital, Taipei Medical University, New Taipei City, Taiwan

<sup>6</sup>Division of Pulmonary Medicine, Department of Internal Medicine, Shuang Ho Hospital, Taipei Medical University, New Taipei City, Taiwan

<sup>7</sup>School of Respiratory Therapy, College of Medicine, Taipei Medical University, Taipei, Taiwan

<sup>8</sup>Cell Physiology and Molecular Image Research Center, Wan Fang Hospital, Taipei Medical University, Taipei, Taiwan

<sup>9</sup>Graduate Institute of Medical Sciences, College of Medicine, Taipei Medical University, Taipei, Taiwan

#### \*Corresponding Authors

*Sheng-Chieh Lin, MD, PhD*

Department of Pediatrics, School of Medicine, College of Medicine, Taipei Medical University, 250 Wuxing Street, Taipei 11031, Taiwan.

Telephone: +886-2-22490088 ext. 2951. Fax: +886-2-22490088. E-mail: [jacklinbox@tmu.edu.tw](mailto:jacklinbox@tmu.edu.tw)

*Hsiao-Chi Chuang, PhD*

Inhalation Toxicology Research Lab (ITRL), School of Respiratory Therapy, College of Medicine, Taipei Medical University, 250 Wuxing Street, Taipei 11031, Taiwan.

Telephone: +886-2-27361661 ext. 3513. Fax: +886-2-27391143. E-mail: [chuanghc@tmu.edu.tw](mailto:chuanghc@tmu.edu.tw)

## Supplementary Information

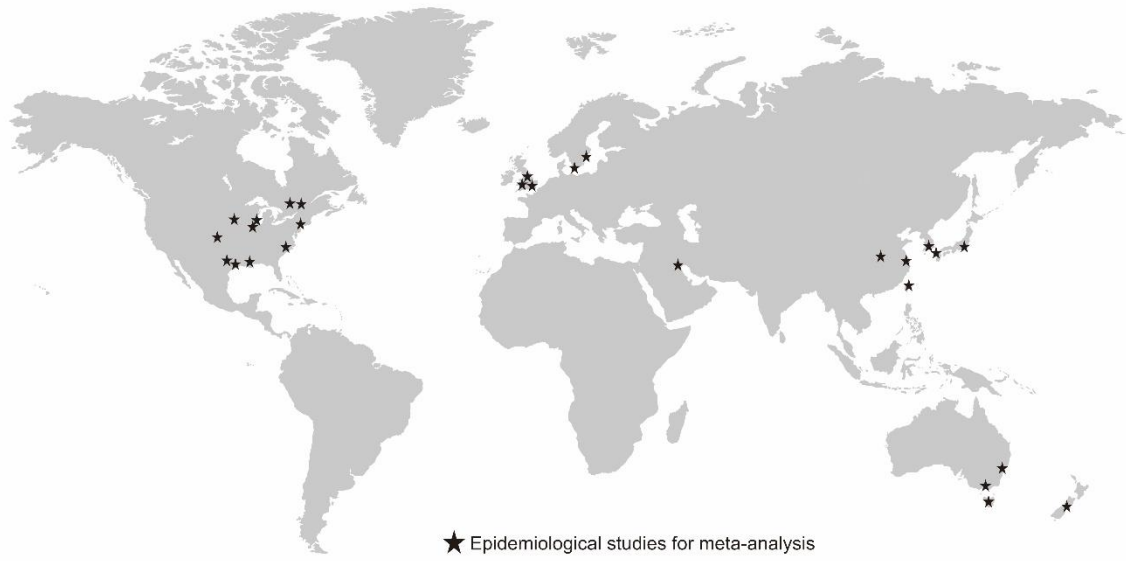

**Figure S1.** Regions covered by the studies included.

## Supplementary Information

**Table S1** Search strategies used for online databases

| Database                  | Search strategies                                                                                                                                                                                                                                                                                                                                                                                                                                                                                                                                                                                                                                                                                                                                                                                                                | Records |
|---------------------------|----------------------------------------------------------------------------------------------------------------------------------------------------------------------------------------------------------------------------------------------------------------------------------------------------------------------------------------------------------------------------------------------------------------------------------------------------------------------------------------------------------------------------------------------------------------------------------------------------------------------------------------------------------------------------------------------------------------------------------------------------------------------------------------------------------------------------------|---------|
| <b>PubMed</b>             | (asthma* OR wheeze* OR wheezing* OR respiratory allergy* OR "asthma"[MeSH Terms]) AND ("meteorology"[Title/Abstract] OR "climate change"[Title/Abstract] OR "climate"[Title/Abstract] OR "climat*" [Title/Abstract] OR "extreme weather"[Title/Abstract] OR "extreme weather event"[Title/Abstract] OR "extreme climate event"[Title/Abstract] OR "ice storm"[Title/Abstract] OR "blizzard"[Title/Abstract] OR "dust storm"[Title/Abstract] OR "hail"[Title/Abstract] OR "lightning"[Title/Abstract] OR "tornado"[Title/Abstract] OR "flood"[Title/Abstract] OR "hurricanes"[Title/Abstract] OR "cold spell"[Title/Abstract] OR "heatwave"[Title/Abstract])                                                                                                                                                                      | 1202    |
| <b>Web of Science</b>     | (TS=(asthma OR wheeze OR wheezing OR respiratory allergy)) AND (TS=(meteorology OR climate change OR climate OR climat OR extreme weather event OR extreme climate event OR ice storm OR blizzard OR dust storm OR hail OR lightning OR tornado OR flood OR hurricanes OR cold spell OR heatwave))                                                                                                                                                                                                                                                                                                                                                                                                                                                                                                                               | 1672    |
| <b>Medline and EMBASE</b> | <p>1) (asthma or wheeze or wheezing or respiratory allergy).mp. [mp=title, abstract, original title, name of substance word, subject heading word, floating sub-heading word, keyword heading word, protocol supplementary concept word, rare disease supplementary concept word, unique identifier, synonyms]</p> <p>2) (meteorology or climate change or climate or climat or extreme weather event or extreme climate event or ice storm or blizzard or dust storm or hail or lightning or tornado or flood or hurricanes or cold spell or heatwave).mp. [mp=title, abstract, original title, name of substance word, subject heading word, floating sub-heading word, keyword heading word, protocol supplementary concept word, rare disease supplementary concept word, unique identifier, synonyms]</p> <p>3) 1 and 2</p> | 3548    |
| <b>ProQuest</b>           | ABSTRACT,TITLE(asthma OR wheeze OR wheezing OR respiratory allergy) AND ABSTRACT,TITLE(meteorology OR climate change OR climate OR climat OR extreme weather OR extreme weather event OR extreme climate event OR ice storm OR blizzard OR dust storm OR hail OR lightning OR tornado OR flood OR hurricanes OR cold spell OR heatwave)                                                                                                                                                                                                                                                                                                                                                                                                                                                                                          | 510     |

## Supplementary Information

**Table S2.** Characteristics of studies that included in systematic review and meta-analysis

| ID                                               | Reference (year)         | Location (continent)                         | Study period      | Study design                 | Age (years) | Sample size                                                 | Outcome                                         | Type                | Effect estimates (95%CI)                                                                                                                                                                                                                  | Extreme weather events |
|--------------------------------------------------|--------------------------|----------------------------------------------|-------------------|------------------------------|-------------|-------------------------------------------------------------|-------------------------------------------------|---------------------|-------------------------------------------------------------------------------------------------------------------------------------------------------------------------------------------------------------------------------------------|------------------------|
| <b>Included study for meta-analysis (n = 31)</b> |                          |                                              |                   |                              |             |                                                             |                                                 |                     |                                                                                                                                                                                                                                           |                        |
| 1                                                | Anderson, et al. (2001)  | Cardiff/<br>Newport,<br>United<br>Kingdom    | 1990-<br>1996     | Cross-<br>sectional<br>study | All         | Not given                                                   | Asthma<br>(ICD codes 493.0,<br>493.1 and 493.9) | HAs                 | The effects of thunderstorm on asthma:<br>OR = 1.300 (95% CI: 1.008-1.676)                                                                                                                                                                | Thunderstorm           |
| 2                                                | Blindauer, et al. (1999) | New York,<br>USA                             | 1996              | Case control<br>study        | All         | 4457                                                        | Asthma<br>(ICD-9, 493)                          | EDs                 | The effects of blizzard on asthma:<br><b>Gender</b><br>Male OR = 1.42 (95% CI: 0.73-2.76)<br>Female OR = 0.70 (95% CI: 0.36-1.37)<br>Overall patients OR = 1.00 (95% CI: 0.50-1.99)                                                       | Blizzard               |
| 3                                                | Campbell, et al. (2019)  | Tasmania,<br>Australia                       | 2008-<br>2016     | A case-<br>crossover         | All         | 8546                                                        | Asthma<br>(ICD-10, J45/J46)                     | EDs                 | The effects of cold spells on asthma:<br>OR = 1.401 (95% CI 0.939-2.090)                                                                                                                                                                  | Heatwave               |
| 4                                                | Celenza, et al. (1996)   | West Central<br>London,<br>United<br>Kingdom | June-July<br>1994 | Cross-<br>sectional<br>study | All         | 148                                                         | Asthma                                          | EDs                 | The effects of thunderstorm on asthma:<br>RR = 3.21 (95% CI: 1.65-6.23)                                                                                                                                                                   | Thunderstorm           |
| 5                                                | Chang, et al. (2021)     | Taiwan                                       | 2008-<br>2011     | Case-cohort<br>study         | All         | 1264                                                        | Asthma<br>(ICD-9-CM: 493)                       | Asthma<br>mortality | The effects of typhoon on asthma:<br>RR = 1.99 (95% CI: 1.24–3.17)                                                                                                                                                                        | Typhoon                |
| 6                                                | Chen, et al. (2021)      | Beijing, China                               | 2012-<br>2015     | Time-<br>stratified<br>case- | All         | Average number<br>of daily asthma<br>hospital<br>admissions | Asthma (ICD-10:<br>J45–J46)                     | HAs                 | The effects of cold spells on asthma (Model 4 controlled for<br>relative humidity and O <sub>3</sub> )<br>RR Lag0 = 1.05 (95% CI: 0.92-1.20); RR Lag1-2 = 1.09 (95% CI:<br>0.96-1.23); RR Lag3-6 = 1.07 (95% CI: 0.95-1.20); RR Lag7-14 = | Cold spells            |

## Supplementary Information

|    |                           |                               |             |                                      |                |        |                                            |                 |                                                                                                                                                                                                                                                                          |             |  |
|----|---------------------------|-------------------------------|-------------|--------------------------------------|----------------|--------|--------------------------------------------|-----------------|--------------------------------------------------------------------------------------------------------------------------------------------------------------------------------------------------------------------------------------------------------------------------|-------------|--|
|    |                           |                               |             | crossover study                      |                |        |                                            |                 | 1.12 (95% CI: 1.02-1.25); RR Lag15-30 = 1.03 (95% CI: 0.93-1.14); RR Lag1-30 = 1.06 (95% CI: 0.97-1.17)                                                                                                                                                                  |             |  |
|    |                           |                               |             |                                      |                |        |                                            |                 | <p><b>Gender</b></p> <p>Male: RR Lag0-30 = 1.64 (95% CI: 0.94-2.84)</p> <p>Female: RR Lag0-30 = 2.90 (95% CI: 1.85-4.54)</p> <p><b>Age</b></p> <p>19-64 years old: RR Lag0-30 = 2.46 (95% CI: 1.56-3.89)</p> <p>≥65 years old: RR Lag0-30 = 2.11 (95% CI: 1.22-3.64)</p> |             |  |
| 7  | Cowan et al (2021)        | North Carolina, USA           | 2010-2011   | Time series                          | All            | 39688  | Asthma (ICD-9 493.XX)                      | EDs             | The effects of hurricane on asthma<br>RR = 1.02 (95% CI: 0.97-1.08).                                                                                                                                                                                                     | Hurricane   |  |
| 8  | Fagan, et al. (2001)      | Illinois, USA                 | Spring 1994 | Cross-sectional study                | Grades 7-12D   | 2693   | Asthma                                     | Asthma symptoms | The effects of flood on asthma:<br>OR = 1.86 (95% CI: 1.42-2.44).                                                                                                                                                                                                        | Flood       |  |
| 9  | Fanny, et al. (2021)      | Houston, USA                  | 2016-2017   | Retrosepective cross-sectional study | 0-18 years old | 39514  | Asthma (ICD-9-CM: 493; ICD-10-AM: J45-J46) | EDs             | The effects of hurricane on asthma:<br>OR = 1.81 (95% CI: 1.52-2.14)                                                                                                                                                                                                     | Hurricane   |  |
| 10 | Figgs, et al. (2019)      | Douglas County, Colorado, USA | 2011-2012   | Case control study                   | All            | 38476  | Asthma (ICD-9, 493)                        | EDs             | The effects of heatwave on asthma:<br>Heatwave (Model A): crude: OR, Lag0 = 1.25 (95% CI: 1.02-1.53); adjust: OR, Lag0 = 1.23 (95% CI: 0.96-1.57)<br>Heatwave (Model B): crude: OR, Lag0 = 1.21 (95% CI: 0.99-1.48); adjust: OR, Lag0 = 1.19 (95% CI: 0.96-1.47)         | Heatwave    |  |
| 11 | Fitzgerald, et al. (2014) | New York, USA                 | 1991-2006   | Time series                          | All            | 396043 | Asthma (ICD-9, 493)                        | HAs             | The effects cold spell on asthma:<br>During a cold spell (December-March): RR = 0.951 (95% CI: 0.921-0.981);<br>After a cold spell (December-March): RR = 0.983 (95% CI: 0.965-1.002)                                                                                    | Cold spells |  |
|    |                           |                               |             |                                      |                |        |                                            |                 | <p><b>During a cold spell:</b></p> <p><b>Gender:</b></p>                                                                                                                                                                                                                 |             |  |

## Supplementary Information

|    |                          |                 |                          |                       |                |       |                                            |                                   |                                                                                                                                                                                                                                                                                                                                                      |             |
|----|--------------------------|-----------------|--------------------------|-----------------------|----------------|-------|--------------------------------------------|-----------------------------------|------------------------------------------------------------------------------------------------------------------------------------------------------------------------------------------------------------------------------------------------------------------------------------------------------------------------------------------------------|-------------|
|    |                          |                 |                          |                       |                |       |                                            |                                   | Females: RR = 0.940 (95% CI: 0.915-0.975); Males: RR = 0.952 (95% CI: 0.928-0.977)                                                                                                                                                                                                                                                                   |             |
|    |                          |                 |                          |                       |                |       |                                            |                                   | <b>Age:</b><br>Young: RR = 0.912 (95% CI: 0.880-0.945); School age: RR = 0.938 (95% CI: 0.903-0.975); Adults: RR = 0.990 (95% CI: 0.956-1.026); Seniors: RR = 0.931 (95% CI: 0.881-0.985)                                                                                                                                                            |             |
| 12 | Guo, et al. (2012)       | Shanghai, China | 2007-2009                | Time series           | 0-14           | 20104 | Asthma (ICD-9, 493)                        | OVs                               | The effects of cold spells on asthma:<br>Cold spells (Model 4 controlled for relative humidity and O3)<br>RR Lag 0 = 1.05 (95% CI: 0.92,1.20); RR Lag 1-2 = 1.09 (95% CI: 0.96,1.23); RR Lag 3-6 = 1.07 (95% CI: 0.95,1.20); RR Lag 7-14 = 1.12 (95% CI: 1.02,1.25); RR Lag 15-30 = 1.03 (95% CI: 0.93,1.14); RR Lag 1-30 = 1.06 (95% CI: 0.97,1.17) | Cold spells |
| 13 | Hasunuma, et al. (2021)  | Fukuoka, Japan  | April 1 to June 30, 2013 | A case-crossover      | 6-12 years old | 160   | Asthma (ICD-9, 493)                        | Asthma symptoms                   | The effects of dust storm on asthma:<br>RR = 5.17 ( 95% CI: 1.02-26.12)                                                                                                                                                                                                                                                                              | Dust storm  |
| 14 | Hoppe, et al. (2012)     | Iowa, USA       | 2008-2009                | A case-crossover      | All            | 71    | Asthma (ICD-9-CM: 493; ICD-10-AM: J45-J46) | Asthma diagnosis, Asthma symptoms | The effects of flood on asthma:<br><b>Asthma diagnosis:</b><br>Unadjusted OR = 2.07 (95% CI: 0.61-7.06) and adjusted OR: 2.16 (95% CI: 0.59-7.92)<br><b>Asthma symptoms:</b><br>Unadjusted OR = 1.77 (95% CI: 0.55-5.68) and adjusted OR: 1.75 (95% CI: 0.50-6.15)                                                                                   | Flood       |
| 15 | Kontowicz, et al. (2022) | Iowa, USA       | 2007-2017                | Cross-sectional study | All            | 62286 | Asthma (ICD-9-CM: 493; ICD-10-AM: J45-J46) | Asthma symptoms                   | The effects of flood on asthma:<br>RR = 1.04 (95% CI: 0.989–1.09)                                                                                                                                                                                                                                                                                    | Flood       |
| 16 | Liu, et al. (2021)       | Heifei, China   | 2013-2016                | Time series           | 0-18           | 32220 | Asthma (ICD-10, J45)                       | HAs                               | The effects of cold spells on asthma:<br>Cold spells (daily minimum AT 5 <sup>th</sup> 3 days):<br>RR, Lag0= 0.997 (95% CI: 0.911,1.092); RR, Lag1= 1.058 (95% CI: 1.009,1.110); RR, Lag2= 1.100 (95% CI: 1.050,1.152); RR, Lag3= 1.109 (95% CI: 1.051, 1.169)                                                                                       | Cold spells |
|    |                          |                 |                          |                       |                |       |                                            |                                   | <b>Gender:</b>                                                                                                                                                                                                                                                                                                                                       |             |

## Supplementary Information

|           |                           |                                    |           |                       |     |         |                                                      |                  |                                                                                                                                                                                                                                                                                                                                                                                                                                                                                                  |                     |
|-----------|---------------------------|------------------------------------|-----------|-----------------------|-----|---------|------------------------------------------------------|------------------|--------------------------------------------------------------------------------------------------------------------------------------------------------------------------------------------------------------------------------------------------------------------------------------------------------------------------------------------------------------------------------------------------------------------------------------------------------------------------------------------------|---------------------|
|           |                           |                                    |           |                       |     |         |                                                      |                  | Male: RR, Lag 0-7= 1.434 (95% CI: 1.094,1.881); Female: RR, Lag 0-7= 1.370 (95% CI: 0.928,2.025)                                                                                                                                                                                                                                                                                                                                                                                                 |                     |
|           |                           |                                    |           |                       |     |         |                                                      |                  | <b>Age:</b><br>Infant: RR, Lag0-7 = 0.973 (95% CI: 0.508,1.864); Pre-school children: RR, Lag0-7 = 1.242 (95% CI: 0.902,1.711); School age children: RR, Lag0-7 = 2.066 (95% CI: 1.443,2.957)                                                                                                                                                                                                                                                                                                    |                     |
| <b>17</b> | Löhmus et al (2022)       | Stockholm, Sweden                  | 2001-2017 | Time series           | All | 737377  | Asthma (ICD-10-AM: J45-J46)                          | OVs              | The effects of thunderstorm on asthma: RR = 1.26 (95% CI: 1.16–1.37)                                                                                                                                                                                                                                                                                                                                                                                                                             | <b>Thunderstorm</b> |
| <b>18</b> | Ma, et al. (2021)         | in 47 Japanese Prefectures         | 1972-2015 | Time series           | All | 107664  | Asthma (ICD-8: 493; ICD-9: 493; and ICD-10: J45–J46) | Asthma mortality | The effects of cold spell on asthma: Lag 0 d (RR = 0.41, 95% CI: –1.23, 2.08), Lag 0–14 d (RR =3.06, 95% CI: –3.84,10.44) and Lag 0–21 d (RR = 2.07, 95% CI: –6.32, 11.23).                                                                                                                                                                                                                                                                                                                      | <b>Cold Spell</b>   |
| <b>19</b> | Merrifield, et al. (2013) | Sydney, New South Wales, Australia | 2004-2009 | Cross-sectional study | All | 4339772 | Asthma (ICD-9-CM: 493; ICD-10-AM: J45-J46)           | EDs, HAs         | The effects of dust storm on asthma:<br>Emergency department visit related to asthma during dust storm: RR = 1.230 (95% CI: 1.099-1.377)<br>Hospital admission related to asthma during dust storm: RR = 1.141 (95% CI 0.991-1.313)<br><b>Gender:</b><br>Emergency department visit:<br>Males: RR = 1.282 (95% CI: 1.205-1.365); Females: RR = 1.318 (95% CI: 1.233-1.409).<br>Asthma hospital admissions:<br>Males: RR = 1.254 (95% CI: 1.066-1.475) Females: RR = 1.418 (95% CI: 1.227- 1.638) | <b>Dust storm</b>   |
| <b>20</b> | Newson, et al. (1997)     | England                            | 1990-1994 | Time series           | All | 873     | Asthma                                               | HAs              | The effects of thunderstorm on asthma:<br><b>Age:</b><br>0-14 years old: OR = 1.25 (95% CI 1.11-1.39)<br>≥15 years old: OR = 1.26 (95% CI 1.12-1.41)<br>All ages: OR = 1.25 (95% CI 1.15-1.36)                                                                                                                                                                                                                                                                                                   | <b>Thunderstorm</b> |

## Supplementary Information

|    |                        |                     |                       |                            |               |           |                                               |     |                                                                                                                                                                                                                                                                                                                                                                                                                                                                                                                                                                                                                                                         |                     |
|----|------------------------|---------------------|-----------------------|----------------------------|---------------|-----------|-----------------------------------------------|-----|---------------------------------------------------------------------------------------------------------------------------------------------------------------------------------------------------------------------------------------------------------------------------------------------------------------------------------------------------------------------------------------------------------------------------------------------------------------------------------------------------------------------------------------------------------------------------------------------------------------------------------------------------------|---------------------|
| 21 | Park, et al. (2022)    | Louisiana, USA      | 2010-2012             | Cross-sectional study      | All           | 63789     | Asthma<br>(ICD-9-CM: 493)                     | EDs | The effects of thunderstorm on asthma:<br>RR = 1.270 (95% CI: 1.056-1.527)<br><b>Age:</b><br>Children: 0-18 years old: RR = 1.270 (95% CI: 1.056-1.527)<br>Adults 19-<65 years old: RR = 1.061 (95% CI: 0.880-1.279)<br>Older adults ≥65 years old: RR = 0.887 (95% CI: 0.572-1.375)                                                                                                                                                                                                                                                                                                                                                                    | <b>Thunderstorm</b> |
| 22 | Ramesh, et al. (2022)  | Texas, USA          | September 18-21, 2019 | Case control study         | All           | 3251700   | Asthma                                        | EDs | The effects of flood on asthma:<br>RR = 1.22 (95% CI: 1.05–1.41)                                                                                                                                                                                                                                                                                                                                                                                                                                                                                                                                                                                        | <b>Flood</b>        |
| 23 | Rappold, et al. (2011) | North Carolina, USA | 2018                  | Cross-sectional study      | All           | 4280      | Asthma<br>(ICD-9-CM: 493)                     | EDs | The effects of thunderstorm on asthma:<br>OR = 1.65 (95% CI: 1.25–2.17)                                                                                                                                                                                                                                                                                                                                                                                                                                                                                                                                                                                 | <b>Thunderstorm</b> |
| 24 | Smith, et al. (2022)   | Midwestern, USA     | 2007-2018             | Retrospective cohort study | All           | 142333    | Asthma<br>(ICD-9-CM: 493; ICD-10-AM: J45-J46) | EDs | The effects of thunderstorm on asthma:<br>RR Lag0 = 1.047 (95% CI: 1.012, 1.083); RR Lag1 = 1.006 (95% CI: 0.975, 1.038); RR Lag2 = 0.998 (95% CI: 0.967, 1.030); RR Lag3 = 0.967 (95% CI: 0.936, 0.998); RR Lag4 = 0.969 (95% CI: 0.939, 1.001); RR Lag 5 = 0.968 (95% CI: 0.937, 0.999); RR Lag 6 = 0.978 (95% CI: 0.948, 1.010); RR Lag 7 = 0.986 (95% CI: 0.955, 1.018); RR Lag 8 = 1.016 (95% CI: 0.984, 1.048); RR Lag 9 = 0.979 (95% CI: 0.948, 1.011)                                                                                                                                                                                           | <b>Thunderstorm</b> |
| 25 | Sohail, et al. (2020)  | Finland             | 2001-2017             | Time series                | ≥18 years old | Not given | Asthma<br>(ICD-10, J45/J46)                   | HAs | The effects of heatwave on asthma:<br>Heatwaves in summer months P90, All heatwave (4 or more days): RR = 0.956 (95% CI: 0.725-1.260);<br>P90, Short heatwave (4-7 days): RR = 1.215 (95% CI: 0.892-1.656);<br>P90, Long heatwave (10 days): RR = 0.475 (95% CI: 0.282-1.197);<br>P99 heatwave (3 or more days): RR = 1.113 (95% CI: 0.734-1.642)<br><b>Age:</b><br>P90 heatwave days in summer months (June–August)<br><b>P90, All heatwave (4 or more days)</b><br>18-64 years, RR = 1.178 (95% CI: 0.714-1.944); 65-74 years, RR = 0.667 (95% CI: 0.312-1.424); 75- years, RR = 1.385 (95% CI: 0.948-2.262)<br><b>P90, Short heatwave (4-7 days)</b> | <b>Heatwave</b>     |



## Supplementary Information

|    |                                  |                  |           |                       |                       |        |                          |                  |                                                                                                                                                                                                                                                                                                                                                                                                                                                                                                                                                                                                                                                                                                                                                                                                                                                                                                                         |            |
|----|----------------------------------|------------------|-----------|-----------------------|-----------------------|--------|--------------------------|------------------|-------------------------------------------------------------------------------------------------------------------------------------------------------------------------------------------------------------------------------------------------------------------------------------------------------------------------------------------------------------------------------------------------------------------------------------------------------------------------------------------------------------------------------------------------------------------------------------------------------------------------------------------------------------------------------------------------------------------------------------------------------------------------------------------------------------------------------------------------------------------------------------------------------------------------|------------|
|    |                                  |                  |           |                       |                       |        |                          |                  | 18-64 years, RR = 1.471 (95% CI: 0.817-2.646); 65-74 years, RR = 1.002 (95% CI: 0.615-1.315); 75 years, RR = 1.724 (95% CI: 0.923-3.003)<br>P90, Long heatwave (10 or more days): 18-64 years, RR = 0.773 (95% CI: 0.320-1.864); 65-74 years, RR = 0.238 (95% CI: 0.061-0.941); 75 years, RR = 0.742 (95% CI: 0.321-1.715) P99 heatwave days in summer months: All heatwave (3 or more days) 18-64 years, RR = 1.271 (95% CI: 0.614-2.628); 65-74 years, RR = 0.713 (95% CI: 0.270,1.882); 75- years, RR = 1.689 (95% CI: 0.914,3.121)                                                                                                                                                                                                                                                                                                                                                                                  |            |
| 26 | Son, et al. (2014)               | Korea            | 2003-2008 | Time series           | All                   | 233890 | Asthma (ICD-10, J45/J46) | HAs              | The effects of heatwave on asthma: Heatwaves (P98, 2- days): RR = 1.091 (95% CI: 0.813,1.463)                                                                                                                                                                                                                                                                                                                                                                                                                                                                                                                                                                                                                                                                                                                                                                                                                           | Heatwave   |
| 27 | Thalib and Al-Taiar (2012)       | Kuwait           | 1996-2000 | Time series           | All                   | 88267  | Asthma (ICD-9, 493)      | HAs              | The effects of dust storm on asthma:<br>RR Lag0 = 1.071 (95% CI: 1.024,1.117); RR Lag1 = 1.030 (95% CI: 0.983,0.077); RR Lag2 = 1.014 (95% CI: 0.967-1.061); RR Lag3 = 1.001 (95% CI: 0.954-1.048); RR Lag5 = 0.966 (95% CI: 0.918-1.013)<br><b>Age:</b><br><15 years old: RR Lag0 = 1.093 (95% CI: 1.032-1.155); RR Lag1 = 1.029 (95% CI: 0.967-1.090); RR Lag2 = 1.022 (95% CI: 0.960-1.084); RR Lag3 = 0.996 (95% CI: 0.934-1.058); RR Lag5 = 0.983 (95% CI: 0.921-1.045)<br>15-64 years old: RR Lag0 = 1.062 (95% CI: 0.984-1.141); RR Lag1 = 1.044 (95% CI: 0.966-1.123); RR Lag2 = 1.032 (95% CI: 0.954-1.110); RR Lag3 = 1.034 (95% CI: 0.956-1.112); RR Lag5 = 0.934 (95% CI: 0.855-1.013)<br>≥65 years old: RR Lag0 = 0.925 (95% CI: 0.756-1.094); RR Lag1 = 0.970 (95% CI: 0.803-1.137); RR Lag2 = 0.891 (95% CI: 0.722-1.059); RR Lag3 = 0.901 (95% CI: 0.73-,1.070); RR Lag5 = 0.992 (95% CI: 0.826-1.0159) | Dust storm |
| 28 | Turcotte-Tremblay, et al. (2014) | Montreal, Canada | 2011      | Cross-sectional study | 12 years old children | 68     | Asthma                   | Asthma symptoms, | The effects of ice storm on asthma:<br>Asthma symptoms OR = 1.11 (95% CI: 1.01–1.23)<br>Asthma diagnosis OR = 1.09 (95% CI: 1.00–1.19)                                                                                                                                                                                                                                                                                                                                                                                                                                                                                                                                                                                                                                                                                                                                                                                  | Ice Storm  |

## Supplementary Information

| Asthma diagnosis |                             |                           |           |                      |                |       |                            |     |                                                                                                                                                                                      |                     |
|------------------|-----------------------------|---------------------------|-----------|----------------------|----------------|-------|----------------------------|-----|--------------------------------------------------------------------------------------------------------------------------------------------------------------------------------------|---------------------|
| 29               | Villeneuve, et al. (2005)   | Ottawa, Canada            | 1992-2000 | Case-crossover study | 2-15 years old | 18970 | Asthma                     | EDs | The effects of thunderstorm on asthma:<br>OR = 1.35 (95% CI: 1.02–1.77)                                                                                                              | <b>Thunderstorm</b> |
| 30               | Yang, et al. (2005)         | Taipei, Taiwan            | 1996-2001 | Case control study   | All            | 1673  | Asthma<br>(ICD-9 code 493) | HAs | The effects of dust storm on asthma:<br>RR = 1.08 (95% CI: 0.97–1.20)                                                                                                                | <b>Dust storm</b>   |
| 31               | Yitshak-Sade, et al. (2014) | Australia and New Zealand | 2005-2011 | Time series          | 0-18 years old | 42920 | Asthma<br>(ICD-9 code 493) | HAs | The effects of dust storm on asthma:<br>RR = 1.10 (95% CI: 0.97-1.25)<br><b>Age</b><br>0-2 years old: RR = 1.07 (95% CI: 0.90-1.26), age ≥3 years old: RR = 1.16 (95% CI: 1.05-1.56) | <b>Dust storm</b>   |

CM, clinical modification; EDs, emergency department visits; HAs, hospital admissions; ICD, International Classification of Diseases; OR, odds ratio; OVs, outpatient visits; RR, relative risk or risk ratio



## Supplementary Information

|    |                                  |     |     |     |     |     |     |     |     |   |
|----|----------------------------------|-----|-----|-----|-----|-----|-----|-----|-----|---|
| 17 | Lohmus, et al. (2022)            | Yes | 8 |
| 18 | Ma, et al. (2021)                | Yes | 8 |
| 19 | Merrifield, et al. (2013)        | Yes | Yes | Yes | Yes | Yes | No  | Yes | Yes | 7 |
| 20 | Newson, et al. (2019)            | Yes | Yes | Yes | Yes | No  | No  | Yes | Yes | 6 |
| 21 | Park, et al. (2022)              | Yes | Yes | Yes | Yes | Yes | No  | Yes | Yes | 7 |
| 22 | Ramesh, et al. (2021)            | Yes | Yes | Yes | Yes | No  | No  | Yes | Yes | 6 |
| 23 | Rappold, et al. (2011)           | Yes | Yes | Yes | Yes | No  | No  | Yes | Yes | 8 |
| 24 | Smith, et al. (2022)             | Yes | 8 |
| 25 | Sohail, et al. (2020)            | Yes | 8 |
| 26 | Son, et al. (2014)               | Yes | Yes | Yes | Yes | Yes | No  | Yes | Yes | 7 |
| 27 | Thalib and Al-Ta'iar (2012)      | Yes | 8 |
| 28 | Turcotte-Tremblay, et al. (2021) | Yes | 8 |
| 29 | Vileneuve et al. (2005)          | Yes | 8 |
| 30 | Yang, et al. (2005)              | Yes | 8 |
| 31 | Yitshak Sade, et al. (2014)      | Yes | Yes | Yes | Yes | Yes | No  | Yes | Yes | 7 |

Note: \* Risk of bias assessment was accessed by the Joanna Briggs Institute (JBI);

## Supplementary Information

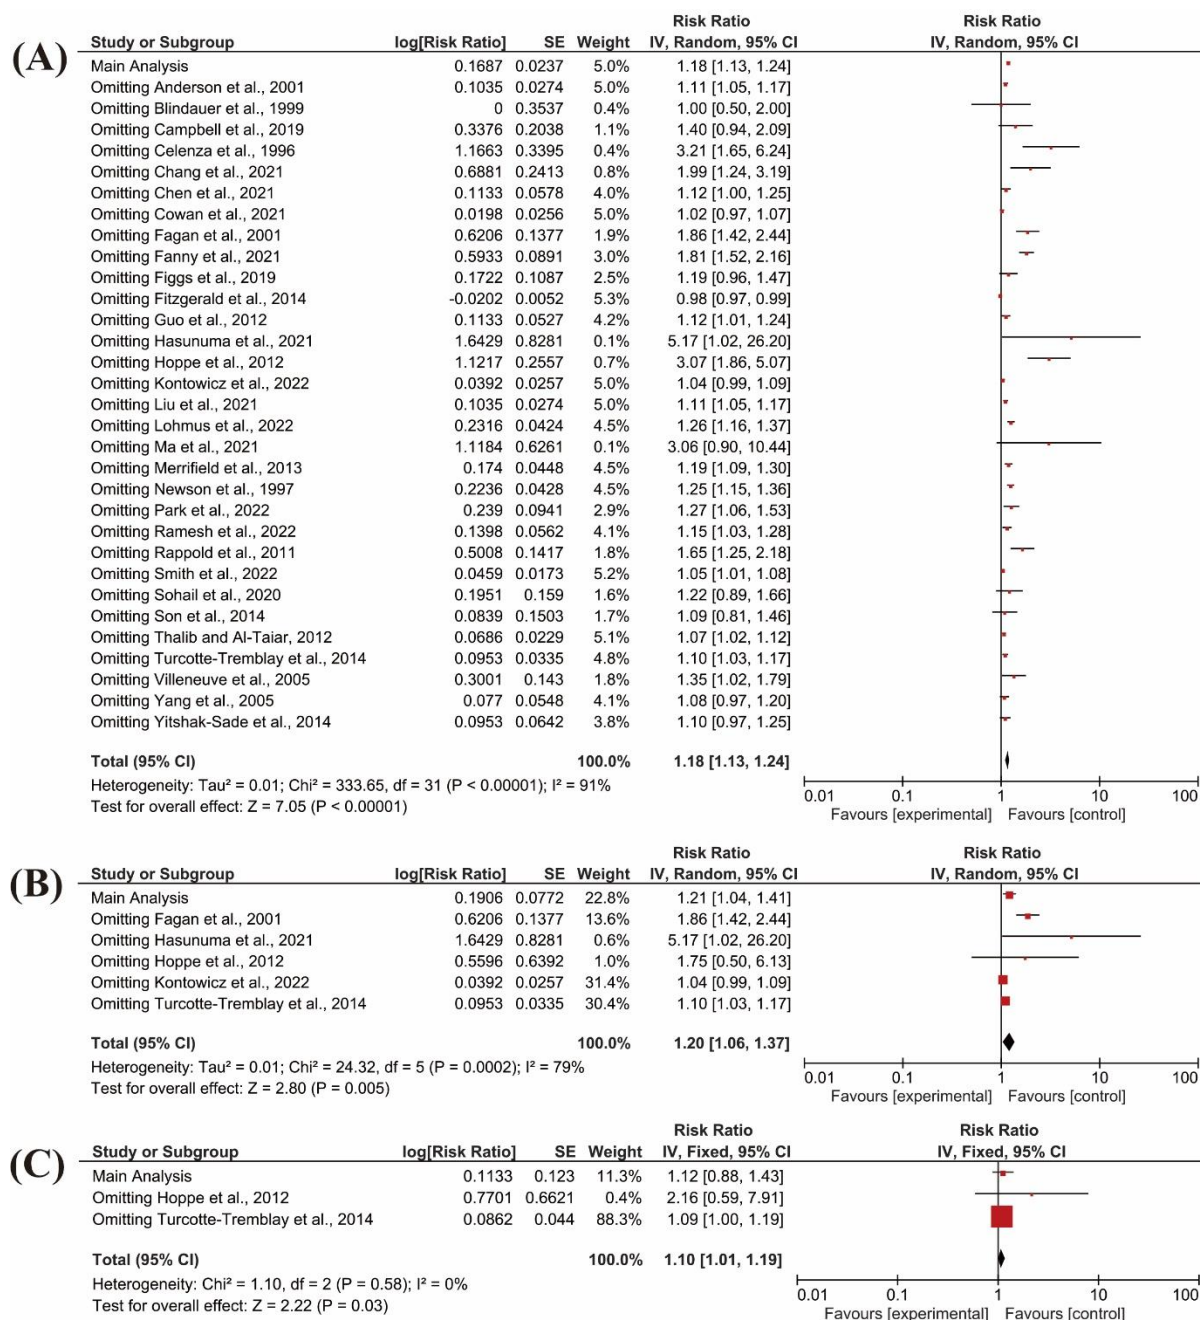

**Figure S2.** Forest plot with sensitivity analysis for extreme weather events with general asthma outcomes A) asthma events B) asthma symptoms C) asthma diagnosis.

## Supplementary Information

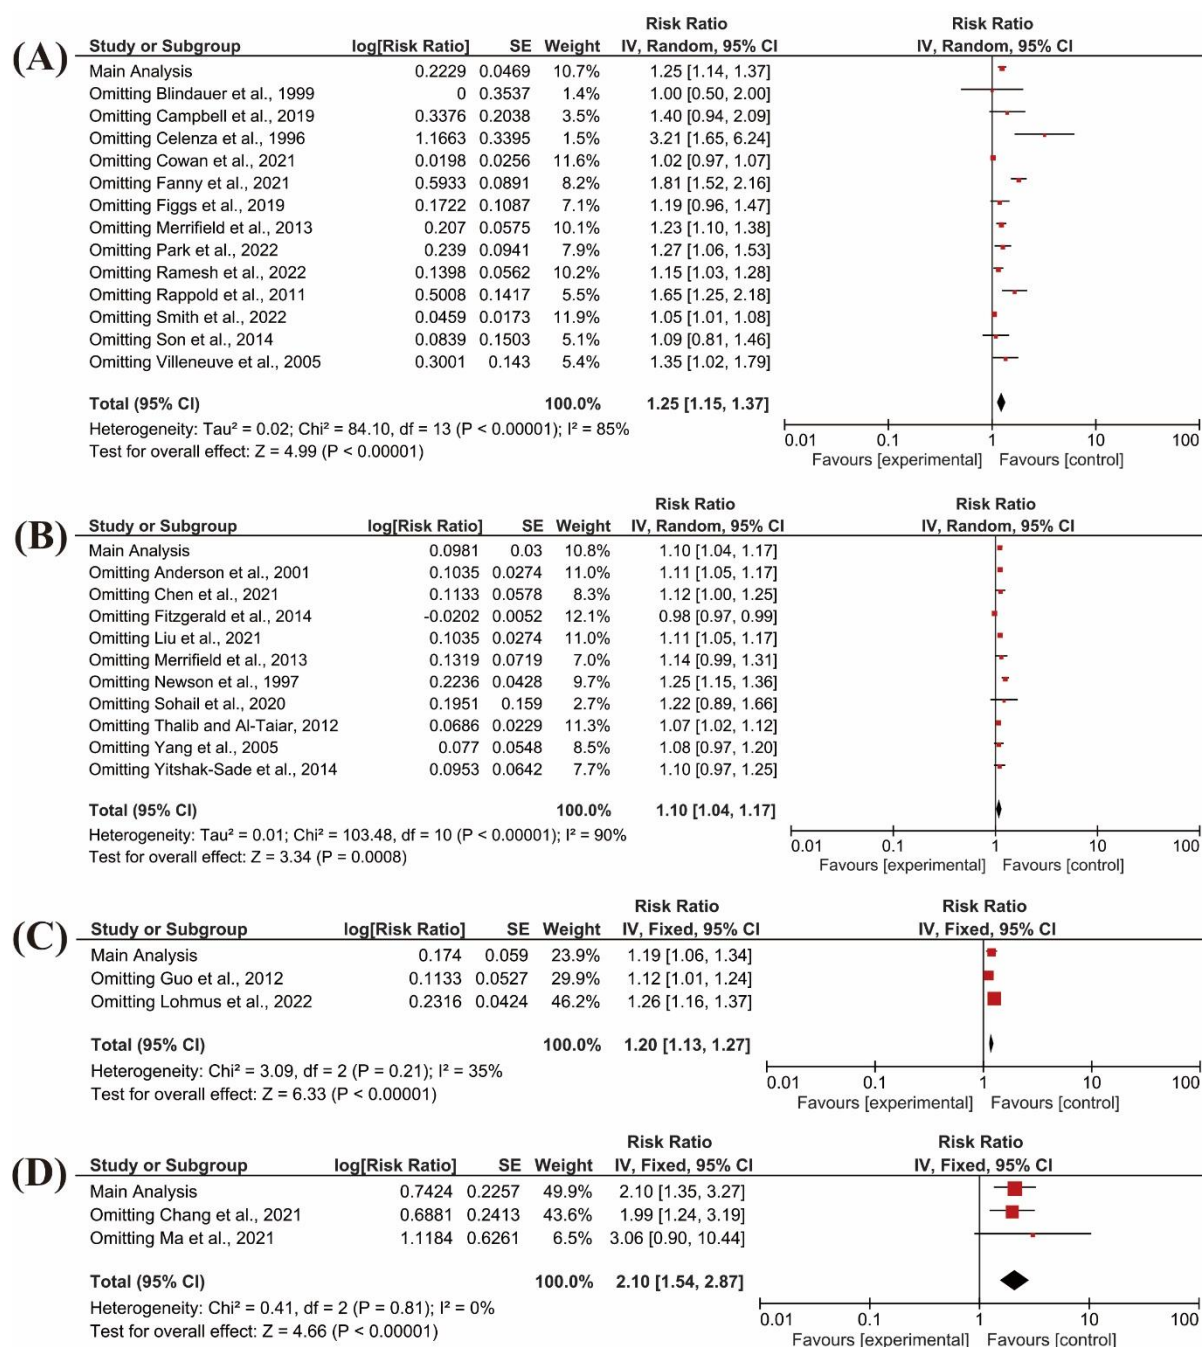

**Figure S3.** Forest plot with sensitivity analysis for extreme weather events with acute exacerbations of asthma A) asthma emergency department visits B) asthma hospital admission C) asthma outpatient visits D) asthma mortality.
